# Supplementary material for: Teleseismic S-wave tomography of South Island, New Zealand upper mantle
Source: Oxford University Press journal article supplement (doi:10.1130/ges01591.1), 2018-04-20
Supplement: ges01591_suppfiles.zip [file ges01591_suppfiles.zip]

# Teleseismic S-wave tomography of South Island, New Zealand upper mantle

**Daniel W. Zietlow<sup>1</sup>, Anne F. Sheehan<sup>1</sup>, and Melissa V. Bernardino<sup>1</sup>**

<sup>1</sup>Cooperative Institute for Research in Environmental Sciences (CIRES) and Department of Geological Sciences, University of Colorado, Boulder,  
399 UCB, 2200 Colorado Ave., Boulder, CO 80309-0399

## CONTENTS OF THIS FILE

Supplemental Table S1, Supplemental Figures S1 to S5, and derivation of crust and sediment corrections for travel-time data

## INTRODUCTION

This supporting information provides a table of station locations and crust/sediment corrections made at those stations (Supplemental Table S1), as well as figures showing travel-time picks in the frequency band 0.08 – 0.12 Hz (Supplemental Figure S2), an L-curve test (Supplemental Figure S3), and a checkerboard test and model inversion from a ray-based code (Supplemental Figures S4 and S5). It also contains a derivation for the crust and sediment corrections made to the teleseismic travel-time measurements.

## TABLES

| STATION | LAT      | LON      | CRUST THICK<br>(km) | SED THICK<br>(km) | SED CORR<br>(s) | CRUST CORR<br>(s) | TOTAL CORR<br>(s) |
|---------|----------|----------|---------------------|-------------------|-----------------|-------------------|-------------------|
| APZ*    | -46.8334 | 167.9888 | 29.2                | 0                 | 0.00            | 1.62              | 1.62              |
| CASS    | -43.0169 | 171.7265 | 29.6                | 0                 | 0.00            | 1.64              | 1.64              |
| CROE    | -42.3365 | 171.3984 | 27.1                | 0                 | 0.00            | 1.51              | 1.51              |
| DCZ*    | -45.4663 | 167.1535 | 52.7                | 0                 | 0.00            | 2.93              | 2.93              |
| DSZ     | -41.7467 | 171.8045 | 30.3                | 0                 | 0.00            | 1.68              | 1.68              |

|       |          |          |      |      |      |      |      |
|-------|----------|----------|------|------|------|------|------|
| EAZ   | -45.2327 | 169.3082 | 38.4 | 0    | 0.00 | 2.13 | 2.13 |
| FOZ   | -43.5338 | 169.8154 | 33.6 | 0    | 0.00 | 1.87 | 1.87 |
| FREW  | -43.4537 | 171.9040 | 23.6 | 0    | 0.00 | 1.31 | 1.31 |
| JCZ   | -44.0749 | 168.7854 | 37.2 | 0    | 0.00 | 2.07 | 2.07 |
| KELY  | -42.2623 | 172.2204 | 32.1 | 0    | 0.00 | 1.78 | 1.78 |
| KHZ*  | -42.4160 | 173.5390 | 28.7 | 0    | 0.00 | 1.59 | 1.59 |
| LBZ   | -44.3872 | 170.1843 | 32.6 | 0    | 0.00 | 1.81 | 1.81 |
| LTZ   | -42.7833 | 172.2709 | 26.6 | 0    | 0.00 | 1.48 | 1.48 |
| MLZ   | -45.3682 | 168.1183 | 32.8 | 0    | 0.00 | 1.82 | 1.82 |
| MQZ   | -43.7077 | 172.6536 | 24.2 | 0    | 0.00 | 1.34 | 1.34 |
| MSZ   | -44.6750 | 167.9263 | 30.3 | 0    | 0.00 | 1.68 | 1.68 |
| NNZ*  | -41.2188 | 173.3793 | 37.6 | 0    | 0.00 | 2.09 | 2.09 |
| NZ02* | -43.9980 | 166.5011 | 16.5 | 0.8  | 0.62 | 0.68 | 1.30 |
| NZ03* | -43.0018 | 165.9995 | 14.6 | 0.78 | 0.61 | 0.60 | 1.20 |
| NZ04* | -41.9993 | 165.5024 | 14.9 | 0.80 | 0.62 | 0.61 | 1.23 |
| NZ05  | -40.6493 | 167.2510 | 14.7 | 0.64 | 0.50 | 0.82 | 1.31 |
| NZ06  | -39.7498 | 168.0011 | 17.8 | 0.45 | 0.35 | 0.99 | 1.34 |
| NZ07  | -40.2501 | 169.0003 | 22.7 | 0.62 | 0.48 | 1.26 | 1.74 |
| NZ08  | -40.9998 | 168.5011 | 16.9 | 0.72 | 0.56 | 0.94 | 1.50 |
| NZ09  | -41.6507 | 167.8998 | 14.5 | 0.87 | 0.68 | 0.81 | 1.48 |
| NZ10  | -43.2007 | 168.0004 | 16.4 | 0.69 | 0.54 | 0.91 | 1.45 |
| NZ11  | -43.3000 | 168.8502 | 24.5 | 0.72 | 0.56 | 1.36 | 1.92 |
| NZ12  | -43.0017 | 169.5986 | 28.7 | 0.75 | 0.58 | 1.59 | 2.18 |
| NZ13  | -42.4997 | 169.0000 | 18.7 | 0.71 | 0.55 | 1.04 | 1.59 |
| NZ14  | -42.6506 | 169.9500 | 25.1 | 0.76 | 0.59 | 1.39 | 1.99 |
| NZ15  | -42.1506 | 170.3996 | 29.2 | 0.76 | 0.59 | 1.62 | 2.21 |
| NZ16  | -41.7499 | 169.2491 | 18.6 | 0.71 | 0.55 | 1.03 | 1.59 |
| NZ18  | -41.0002 | 170.0000 | 20.7 | 0.70 | 0.54 | 1.15 | 1.69 |
| NZ19  | -40.7502 | 170.9004 | 23.7 | 0.72 | 0.56 | 1.32 | 1.88 |
| NZ20  | -40.1995 | 170.7503 | 24.3 | 0.70 | 0.54 | 1.35 | 1.89 |
| NZ21  | -39.5005 | 170.0001 | 22.7 | 0.64 | 0.50 | 1.26 | 1.76 |
| NZ22  | -44.5006 | 173.9987 | 30.6 | 1.26 | 0.98 | 1.70 | 2.68 |
| NZ23  | -45.1494 | 174.8520 | 30.8 | 0.72 | 0.56 | 1.71 | 2.27 |
| NZ24  | -45.4984 | 176.0026 | 30.8 | 0.36 | 0.28 | 1.71 | 1.99 |

|      |          |          |      |      |      |      |      |
|------|----------|----------|------|------|------|------|------|
| NZ25 | -45.9978 | 174.7504 | 33.7 | 0.54 | 0.42 | 1.87 | 2.29 |
| NZ26 | -46.9979 | 174.4984 | 28.6 | 0.53 | 0.41 | 1.59 | 2.00 |
| NZ27 | -46.5007 | 173.2497 | 24.5 | 1.06 | 0.82 | 1.36 | 2.19 |
| NZ28 | -45.9639 | 171.7514 | 30.7 | 0.93 | 0.72 | 1.71 | 2.43 |
| NZ29 | -45.2474 | 172.2535 | 28.4 | 1.14 | 0.89 | 1.58 | 2.46 |
| NZ30 | -45.4980 | 173.5010 | 27.6 | 1.36 | 1.06 | 1.53 | 2.59 |
| ODZ  | -45.0456 | 170.6445 | 27.7 | 0    | 0.00 | 1.54 | 1.54 |
| OPZ  | -45.8860 | 170.5977 | 36.6 | 0    | 0.00 | 2.03 | 2.03 |
| OXZ  | -43.3259 | 172.0383 | 22.6 | 0    | 0.00 | 1.26 | 1.26 |
| PYZ* | -46.1679 | 166.6807 | 37.1 | 0    | 0.00 | 2.06 | 2.06 |
| QRZ  | -40.8272 | 172.5290 | 32.3 | 0    | 0.00 | 1.79 | 1.79 |
| RPZ  | -43.7163 | 171.0538 | 28.9 | 0    | 0.00 | 1.61 | 1.61 |
| SYZ  | -46.5385 | 169.1388 | 33.6 | 0    | 0.00 | 1.87 | 1.87 |
| THZ* | -41.7642 | 172.9051 | 37.4 | 0    | 0.00 | 2.08 | 2.08 |
| TUZ  | -45.9556 | 169.6311 | 35.8 | 0    | 0.00 | 1.99 | 1.99 |
| WHZ  | -45.8940 | 167.9470 | 27.6 | 0    | 0.00 | 1.53 | 1.53 |
| WKZ  | -44.8287 | 169.0175 | 42.8 | 0    | 0.00 | 2.38 | 2.38 |
| WVZ  | -43.0760 | 170.7366 | 30.2 | 0    | 0.00 | 1.68 | 1.68 |

**Supplemental Table S1.** List of station locations used in this study along with estimates of crust (crust thick) and sediment (sed thick) thicknesses used to make corrections to the travel-time data. The corrections shown here (sed corr, crust corr, and total corr) are for a vertically traveling S-wave assuming a sediment speed of 1.0 km/s, a crustal speed of 3.6 km/s, an oceanic crustal speed of 3.8 km/s (stations NZ02 – NZ04), and a mantle speed of 4.5 km/s. Starred stations (\*) are stations at which Pn measurements were not published (Collins and Molnar, 2014) and we instead used crustal thicknesses from Salmon et al. (2013).

## FIGURES

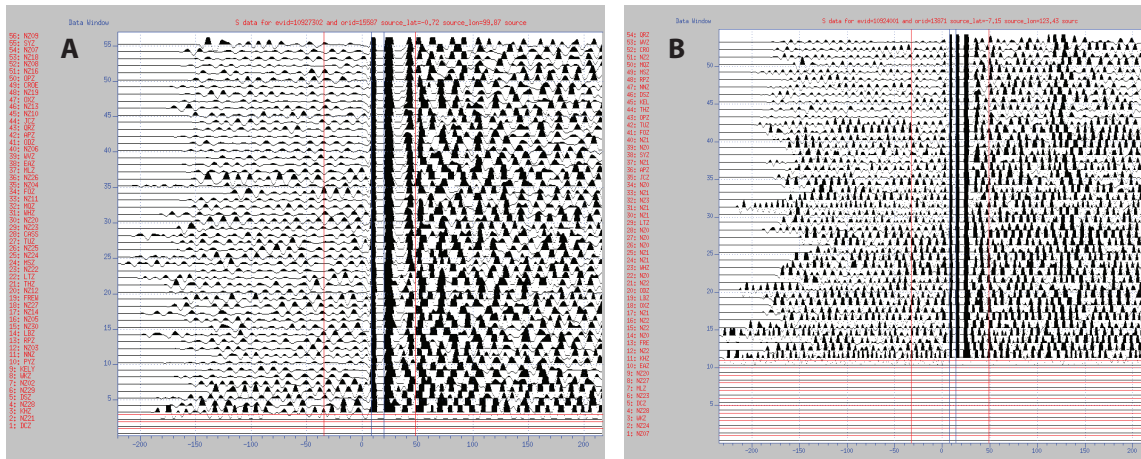

**Supplemental Figure S1.** Examples of the cross-correlation of waveforms. Waveforms of an earthquake A) from offshore Sumatra with backazimuth of  $283^\circ$  ( $m_b = 7.1$ ) in the filter band  $0.05 - 0.1$  Hz; and B) from the Banda Sea with backazimuth of  $297^\circ$  ( $m_b = 6.3$ ) in the filter band  $0.08 - 0.12$  Hz. Red lines denote the beam window and blue lines denote the robust window as defined in *dbxcor* (Pavlis and Vernon, 2010). Station names are to the left of the seismograms, with MOANA OBSs beginning in “NZ.” The x-axis is time in seconds. Traces are ordered by correlation coefficient, with the trace with the highest correlation coefficient at the top.



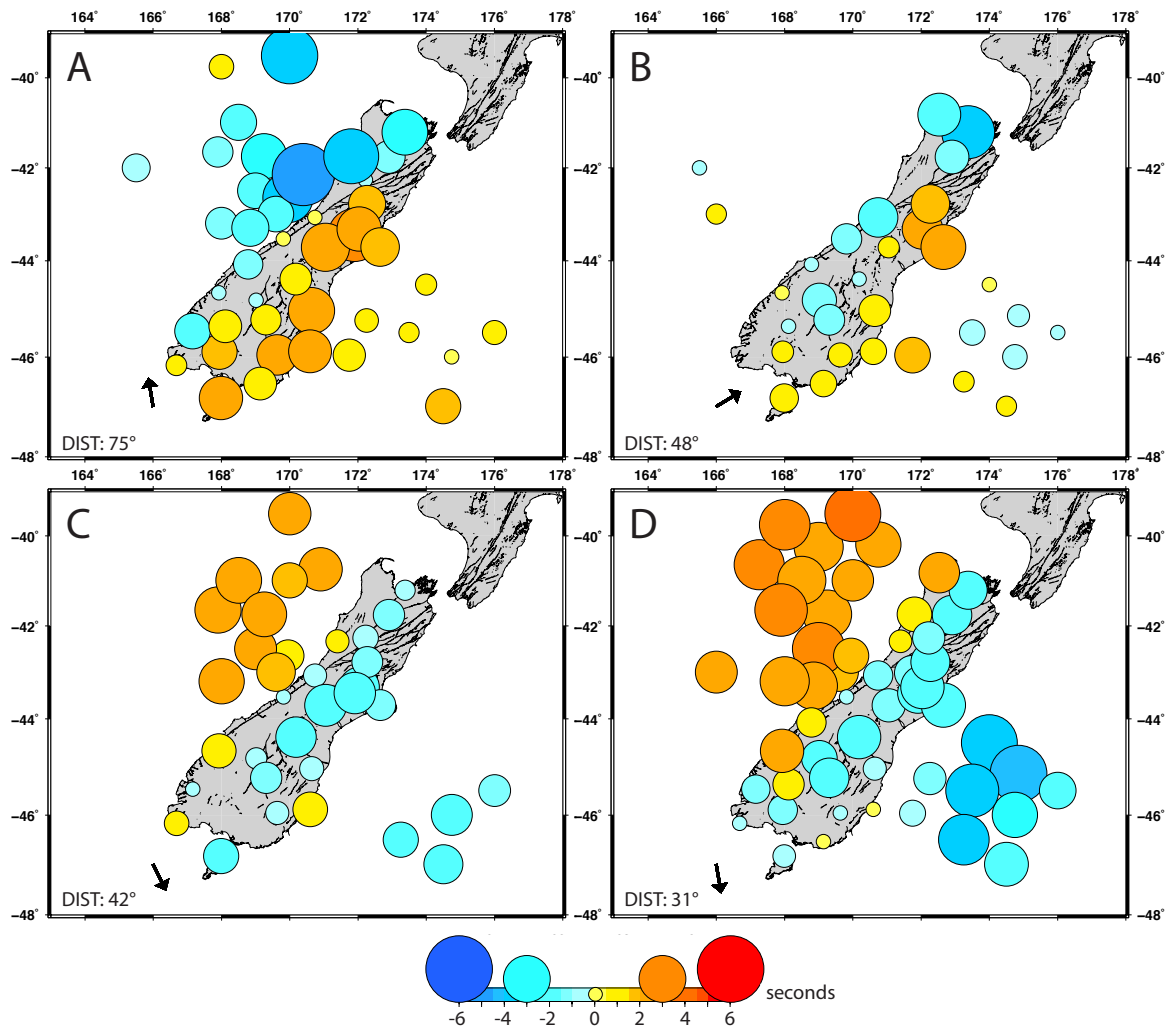

**Supplemental Figure S2.** Plot of measured travel-time residuals in the band 0.08 – 0.12 Hz after application of a crustal and sediment correction for 4 different events from different backazimuths. Earthquakes A) near the South Sandwich Islands with backazimuth of  $171^\circ$  ( $m_b = 6.2$ ; B) on the Southwest Indian Ridge with a backazimuth of  $239^\circ$  ( $m_b = 5.8$ ); C) offshore the Solomon Islands with a backazimuth of  $334^\circ$  ( $m_b = 6.3$ ); and D) north of Vanuatu with a backazimuth of  $350^\circ$  ( $m_b = 5.7$ ). Black arrows point from the earthquake, with epicentral distance given on the plot. A negative (positive) travel-time residual indicates an early (late) arrival with respect to average times for the AK135 reference model (Kennett et al., 1995).

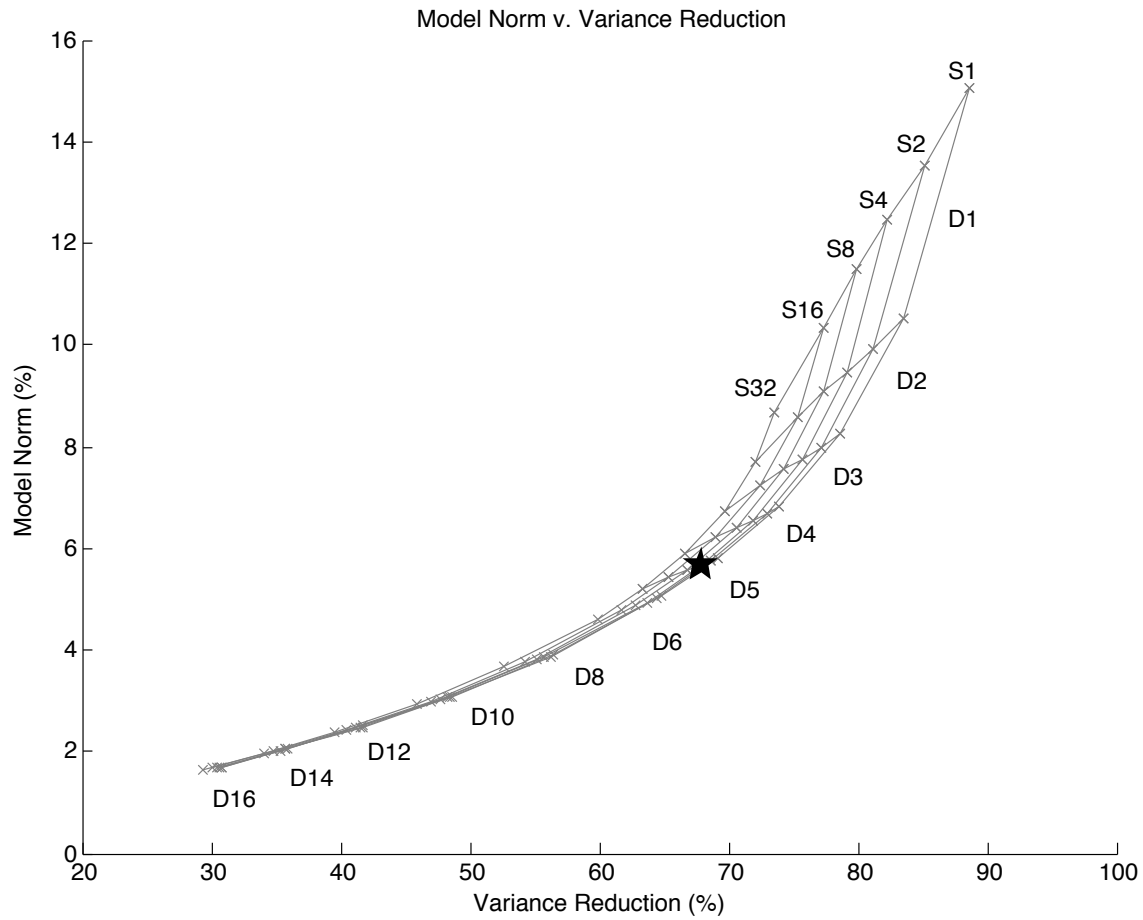

**Supplemental Figure S3.** Plot depicting the trade-off analysis between model norm and variance reduction for inversion of the crust and sediment corrected S-wave travel-time data. Each curve represents a single smoothing value (labeled “S”), and each point on the curve shows a damping value (labeled “D”). The black star shows the parameters used in this study (damping = 5 and smoothing = 4).

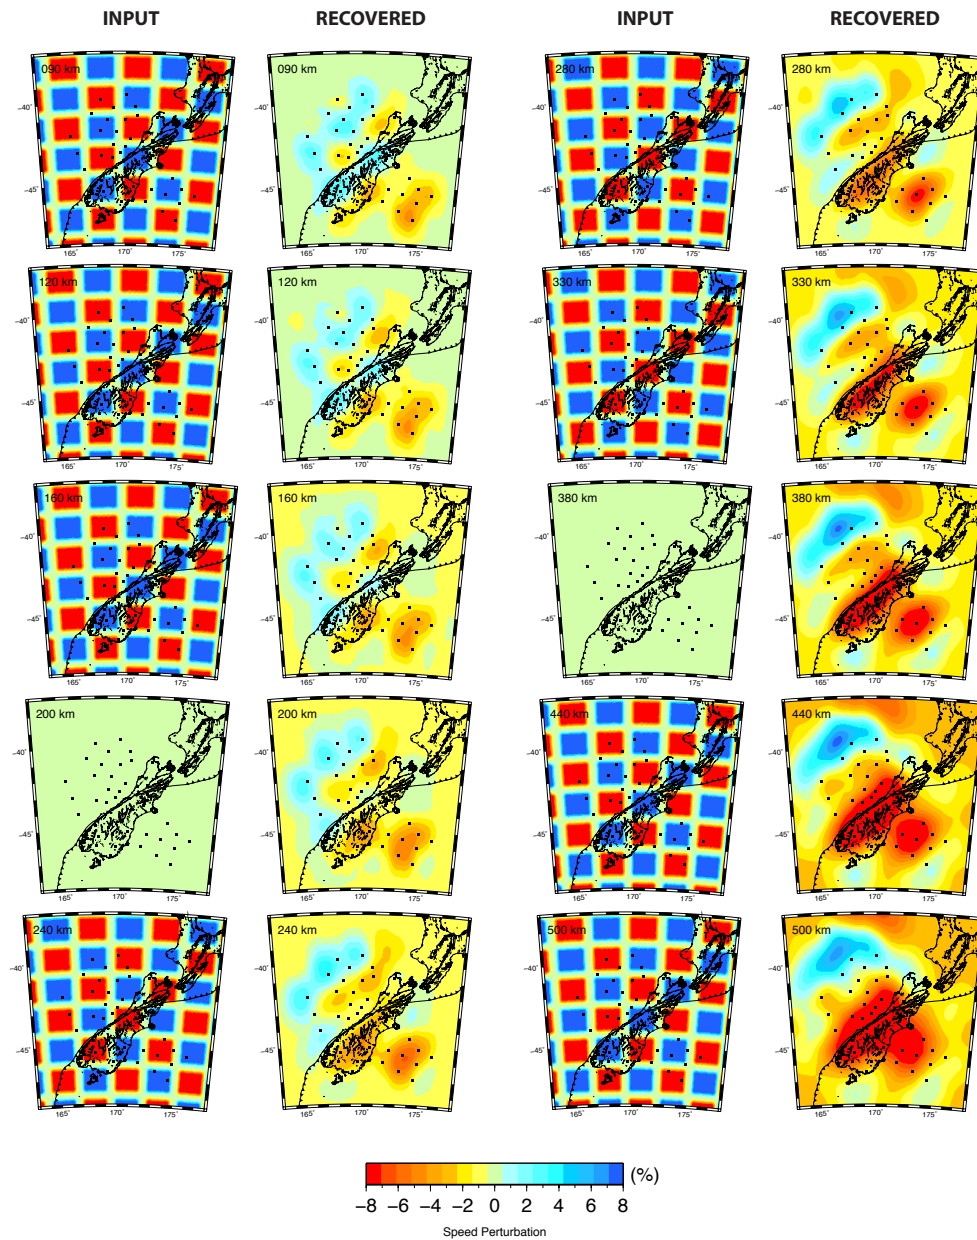

**Supplemental Figure S4.** Resolution for depth slices at 90, 120, 160, 200, 240, 280, 330, 380, 440, and 500 km based on a standard checkerboard test with cubes 200 km per side using the ray-based code from Roecker et al. (2006). The left column shows the synthetic input structure (+8% or -8% the reference S-wave speed of AK135) and the right column shows the recovered structure.

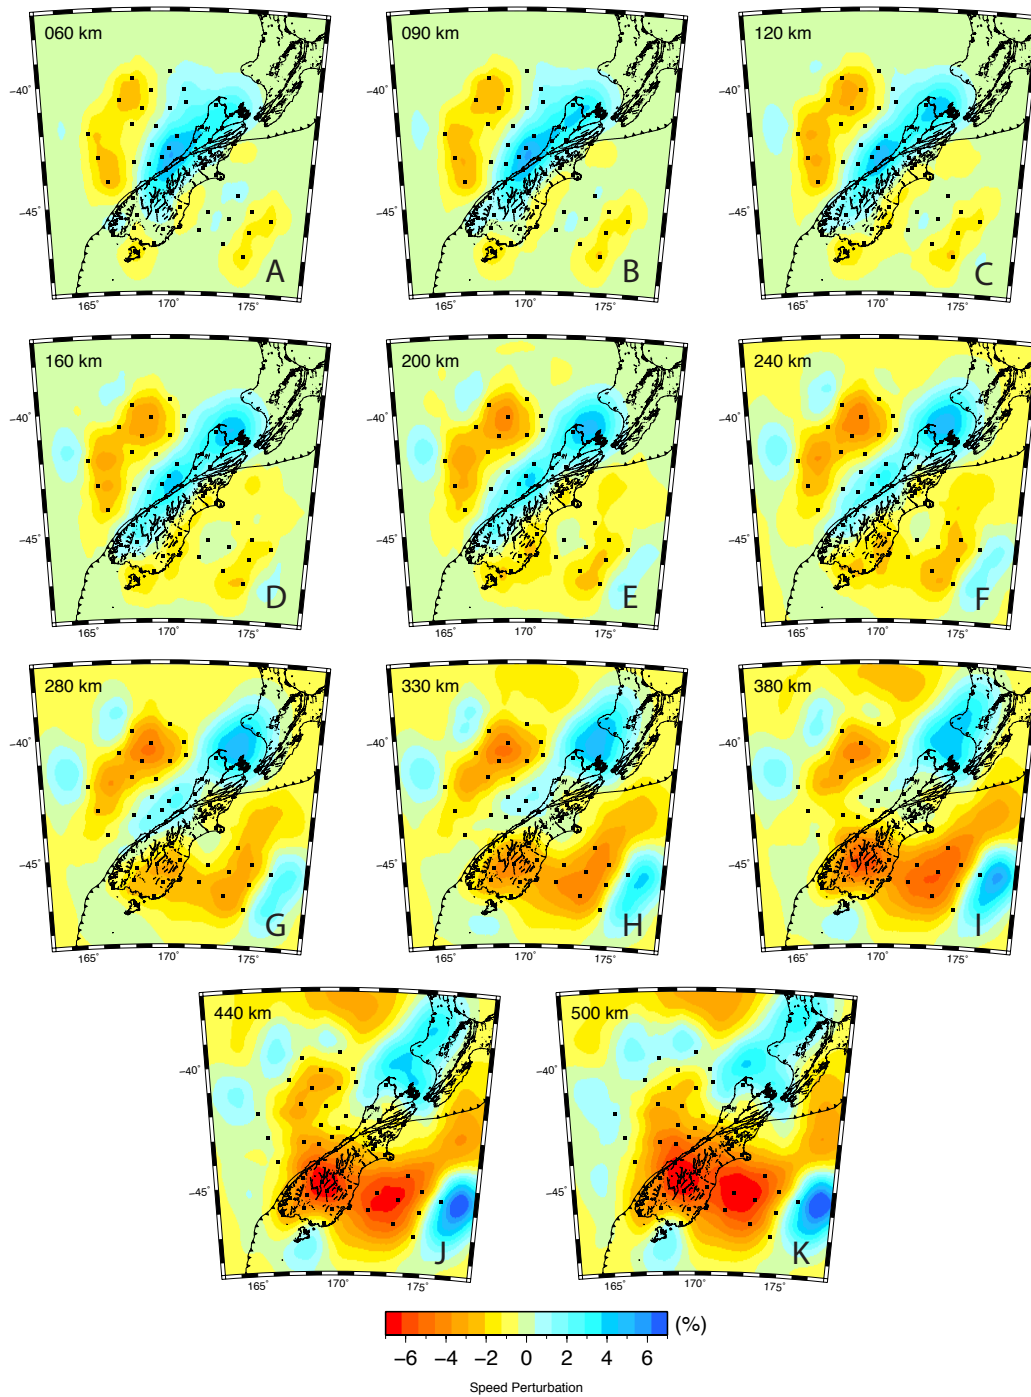

**Supplemental Figure S5.** Depth slices at 60, 90, 120, 160, 200, 240, 280, 330, 380, 440, and 500 km through an S-wave tomogram obtained using the ray-based tomography code of Roecker et al. (2006), using the stations shown in Figure 1 and earthquakes shown in Figure 3.

## CORRECTIONS FOR SEDIMENT AND CRUST DERIVATION

We assume that the sediment and crust correction to the teleseismic travel-time measurements is the sum of the travel-time difference between a ray traveling in sediment versus mantle plus the difference between a ray traveling in crust versus mantle (see schematic below).

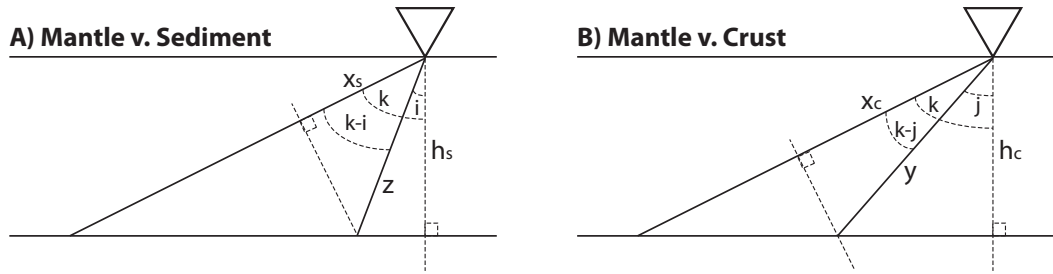

The travel-time through the sediment layer is

$$t_c = \frac{h_s}{v_s \cos(i)}, \quad (\text{S1})$$

where  $h_s$  is the thickness of the sediment,  $v_s$  is the wave speed in sediment, and  $i$  is the incidence angle in the sediment. For the equivalent path through the mantle:

$$x_s = z \cos(k - i), \quad (\text{S2})$$

where  $k$  is the incidence angle in the mantle and  $z = h_s / \cos(i)$ . The time it takes to travel path  $x_s$  is

$$t_m = \frac{h_s \cos(k-i)}{v_m \cos(i)}, \quad (\text{S3})$$

where  $v_m$  is the wave speed in the mantle. The difference in travel-time between a ray traveling in sediment versus in the crust is

$$\Delta T_s = \frac{h_s}{\cos(i)} \left[ \frac{1}{v_s} - \frac{\cos(k-i)}{v_m} \right]. \quad (\text{S4})$$

Likewise, for the travel-time difference between crust and mantle:

$$\Delta T_c = \frac{h_c}{\cos(j)} \left[ \frac{1}{v_c} - \frac{\cos(k-j)}{v_m} \right]. \quad (\text{S5})$$

Thus, the total correction is

$$\Delta T = \frac{h_s}{\cos(i)} \left[ \frac{1}{v_s} - \frac{\cos(k-i)}{v_m} \right] + \frac{h_c}{\cos(j)} \left[ \frac{1}{v_c} - \frac{\cos(k-j)}{v_m} \right]. \quad (\text{S6})$$

Equation S6 is the same as Equation 1 in the main text.

## FILE OF S-WAVE TOMOGRAM

A comma-separated values file of the S-wave tomogram is provided (S\_TOMO\_data.csv). It is in the format Longitude (°), Latitude (°), Depth (km), dVs (%), Hit Quality.

## REFERENCES CITED

- Collins, J.A. and Molnar, P., 2014, Pn anisotropy beneath the South Island of New Zealand and implications for distributed deformation in continental lithosphere: *J. Geophys. Res. Solid Earth*, vol. 119, doi:10.1002/2014JB011233.
- Kennett, B.L.N., Engdahl, E.R., and Buland, R., 1995, Constraints on seismic velocities in the Earth from traveltimes: *Geophys. J. Int.*, vol. 122, p. 108-124, doi:10.1111/j.1365-246X.1995.tb03540.
- Pavlis, G.L., and Vernon, F.L., 2010, Array processing of teleseismic body waves with the USArray: *Computers & Geosciences*, vol. 36, p. 910-920, doi:10.1016/j.cageo.2009.10.008.
- Roecker, S., Thurber, C., Roberts, K., and Powell, L., 2006, Refining the image of the San Andreas Fault near Parkfield, California using a finite difference travel time computation technique: *Tectonophysics*, vol. 426, p. 189-205, doi:10.1016/j.tecto.2006.02.026.
- Salmon, M., Kennett, B., Stern, T., and Aitken, A., 2013, The Moho in Australia and New Zealand: *Tectonophysics*, vol. 609, p. 288-298, doi: 10.1016/j.tecto.2012.07.009.
